# Supplementary material for: Towards a Universal Hygroscopic Growth Calibration for Low-Cost PM 2.5 Sensors
Source: Copernicus journal article supplement (doi:10.5194/egusphere-2023-1701), 2023-08-07
Supplement: Supplementary file 1 [file egusphere-2023-1701-supplement.pdf]

**Table S1.** Monthly performance statistics for the sensor at Laney, relative to the co-located EPA AQS site, before and after the calibration was applied (r: Pearson Correlation Coefficient, MFB: Mean Fractional Bias, NRMSE: Normalized Root-Mean-Square Error).

| Month    | Before Calibration |        |       | After Calibration |        |       |
|----------|--------------------|--------|-------|-------------------|--------|-------|
|          | r                  | MFB    | NRMSE | r                 | MFB    | NRMSE |
| Jan 2021 | 0.818              | 0.455  | 0.918 | 0.842             | -0.021 | 0.43  |
| Feb 2021 | 0.740              | -0.023 | 0.666 | 0.808             | -0.101 | 0.529 |
| Mar 2021 | 0.711              | -0.305 | 0.558 | 0.789             | -0.152 | 0.461 |
| Apr 2021 | 0.666              | -0.335 | 0.486 | 0.768             | -0.087 | 0.343 |
| May 2021 | 0.611              | -0.406 | 0.553 | 0.755             | -0.145 | 0.365 |
| Jun 2021 | 0.728              | -0.433 | 0.702 | 0.84              | -0.205 | 0.479 |
| Jul 2021 | 0.564              | -0.154 | 0.54  | 0.714             | 0.035  | 0.452 |
| Aug 2021 | 0.825              | 0.134  | 0.47  | 0.863             | 0.203  | 0.519 |
| Sep 2021 | 0.782              | 0.107  | 0.606 | 0.836             | -0.021 | 0.543 |
| Oct 2021 | 0.727              | -0.358 | 0.581 | 0.815             | -0.575 | 0.684 |
| Nov 2021 | 0.862              | 0.809  | 1.051 | 0.914             | -0.1   | 0.263 |
| Dec 2021 | 0.902              | 0.971  | 1.563 | 0.914             | -0.004 | 0.425 |
| Jan 2022 | 0.886              | 0.925  | 1.157 | 0.924             | 0.202  | 0.363 |
| Feb 2022 | 0.862              | 0.446  | 0.896 | 0.896             | 0.187  | 0.555 |
| Mar 2022 | 0.622              | -0.2   | 0.57  | 0.726             | -0.272 | 0.491 |
| Apr 2022 | 0.647              | -0.325 | 0.549 | 0.731             | -0.201 | 0.459 |
| May 2022 | 0.721              | -0.406 | 0.577 | 0.808             | -0.208 | 0.427 |
| Jun 2022 | 0.674              | -0.345 | 0.537 | 0.77              | -0.127 | 0.431 |
| Jul 2022 | 0.716              | -0.263 | 0.57  | 0.783             | -0.112 | 0.5   |
| Aug 2022 | 0.741              | -0.109 | 0.533 | 0.794             | -0.015 | 0.517 |
| Sep 2022 | 0.570              | -0.201 | 0.515 | 0.705             | -0.211 | 0.453 |
| Oct 2022 | 0.728              | 0.123  | 0.556 | 0.764             | -0.164 | 0.417 |
| Nov 2022 | 0.870              | 0.181  | 0.627 | 0.901             | -0.27  | 0.412 |
| Dec 2022 | 0.916              | 0.391  | 0.918 | 0.934             | -0.253 | 0.384 |

**Table S2.** Performance statistics for the sensor in LA relative to its nearest EPA AQS site with different calibration schemes applied ( $R^2$ : Coefficient of Determination, RMSE: Root-Mean-Square Error)

| Calibration Scheme       | $R^2$ | RMSE ( $\mu\text{g}/\text{m}^3$ ) |
|--------------------------|-------|-----------------------------------|
| No Calibration           | 0.312 | 6.96                              |
| National EPA Calibration | 0.116 | 7.89                              |
| Seasonal RH Calibration  | 0.472 | 6.09                              |

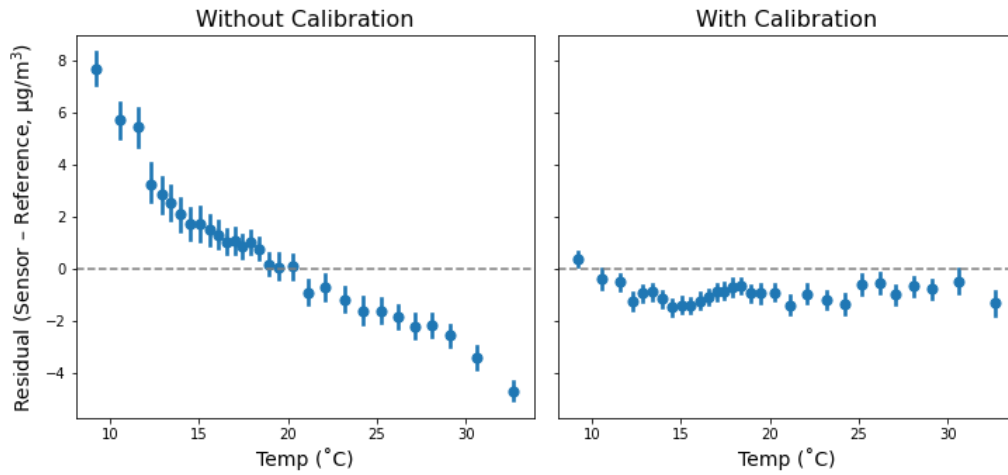

**Figure S1.** Measurement residuals (Sensor output – EPA AQS values) for Laney data without and with the seasonal RH dependence calibration, binned into 30 temperature bins.

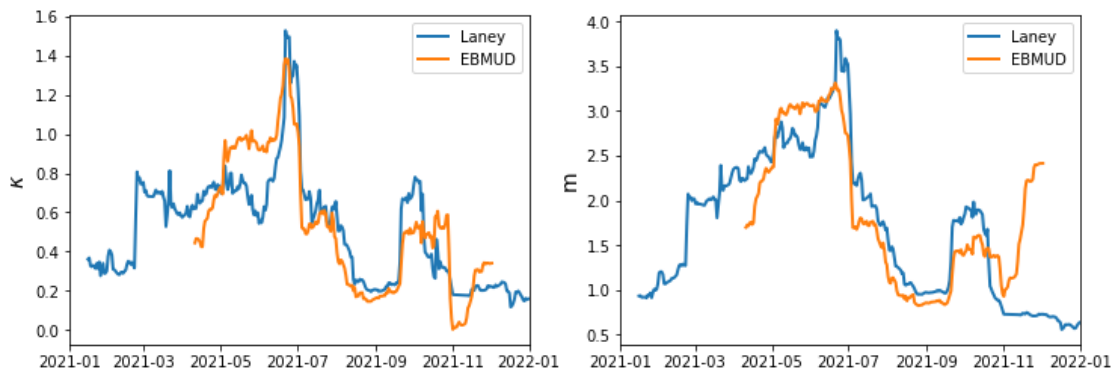

**Figure S2.** Calculated calibration parameters for two co-location sites in the Bay Area, CA: Laney and EBMUD.

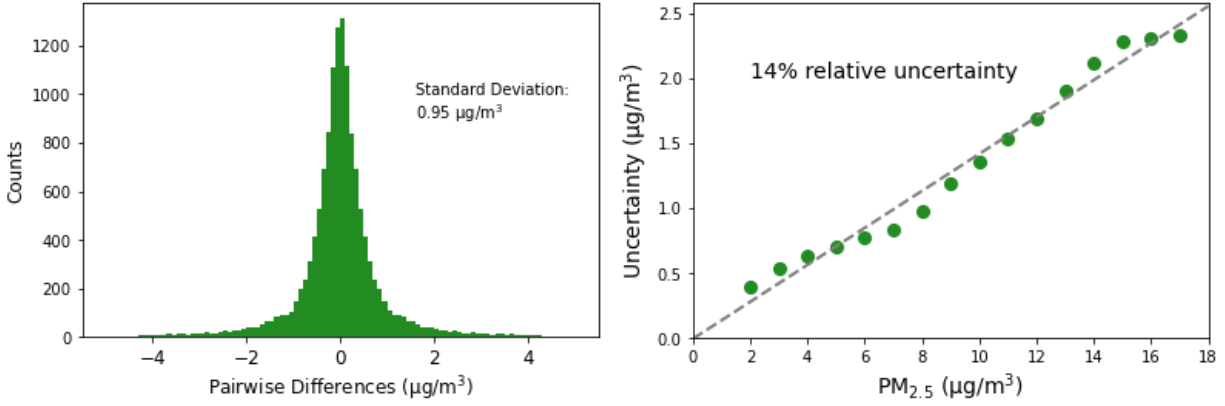

**Figure S3.** Pairwise differences of 10 co-located Plantowers over 1 month in lab show that instrument noise is about  $1 \mu\text{g}/\text{m}^3$ , similar to the manufacturer’s reported uncertainty. Analysis by size bin shows that the uncertainty is a relative uncertainty of about 14%.

### *Derivation of the RH-Dependent Multiplicative Factor*

From  $\kappa$ -Köhler Theory, the saturation ratio for an aqueous particle is given by

$$S = \left(1 + \kappa \frac{V_s}{V_w}\right)^{-1} \exp\left(\frac{4\gamma M_w}{\rho_w RT d_p}\right)$$

where the pre-exponential term is the activity of water:

$$a_w = \left(1 + \kappa \frac{V_s}{V_w}\right)^{-1}$$

where  $\kappa$  is the hygroscopic growth factor,  $V_s$  is the volume of the dry matter in the particle, and  $V_w$  is the volume of water in the particle. Rearrangement of the equation yields:

$$\frac{V_w}{V_s} = \frac{\kappa}{\frac{1}{a_w} - 1}$$

To convert the “wet” measured aerosol mass to a “dry” mass, we define the necessary scalar as  $V_s/(V_s+V_w)$ . We can manipulate the above equation to get:

$$\frac{V_s}{V_s} + \frac{V_w}{V_s} = \frac{V_s + V_w}{V_s} = 1 + \frac{\kappa}{\frac{1}{a_w} - 1}$$

And subsequently:

$$\frac{V_s}{V_s + V_w} = \frac{1}{1 + \frac{\kappa}{\frac{1}{a_w} - 1}}$$

We can then relate the activity of water to the relative humidity. To start, consider the thermodynamic equilibrium of water between the gas and aqueous phases:

$$\mu_{H_2O}^\circ + RT \ln(p_w) = \mu_{H_2O}^* + RT \ln(a_w)$$

For pure water,  $a_w=1$  and  $p_w=p_w^\circ$  (the saturation vapor pressure), so

$$\mu_{H_2O}^* - \mu_{H_2O}^\circ = RT \ln(p_w^\circ)$$

Combining these two equations, we get:

$$RT \ln(p_w) - RT \ln(p_w^\circ) = RT \ln(a_w)$$

Which simplifies to

$$a_w = \frac{p_w}{p_w^\circ} = \frac{RH}{100}$$

Substituting this into the above equation, we arrive at our RH-dependent scaling factor:

$$\frac{V_s}{V_s + V_w} = \frac{1}{1 + \frac{\kappa}{100/RH - 1}}$$
